# Supplementary material for: ANGPTL2 promotes VEGF-A synthesis in human lung cancer and facilitates lymphangiogenesis
Source: publisher site journal article supplement (doi:10.18632/aging.204581), 2023-03-13
Supplement: Supplementary file [file aging-v15i5-204581-supplementary-material-SD2.pdf]

**SUPPLEMENTARY FIGURE**

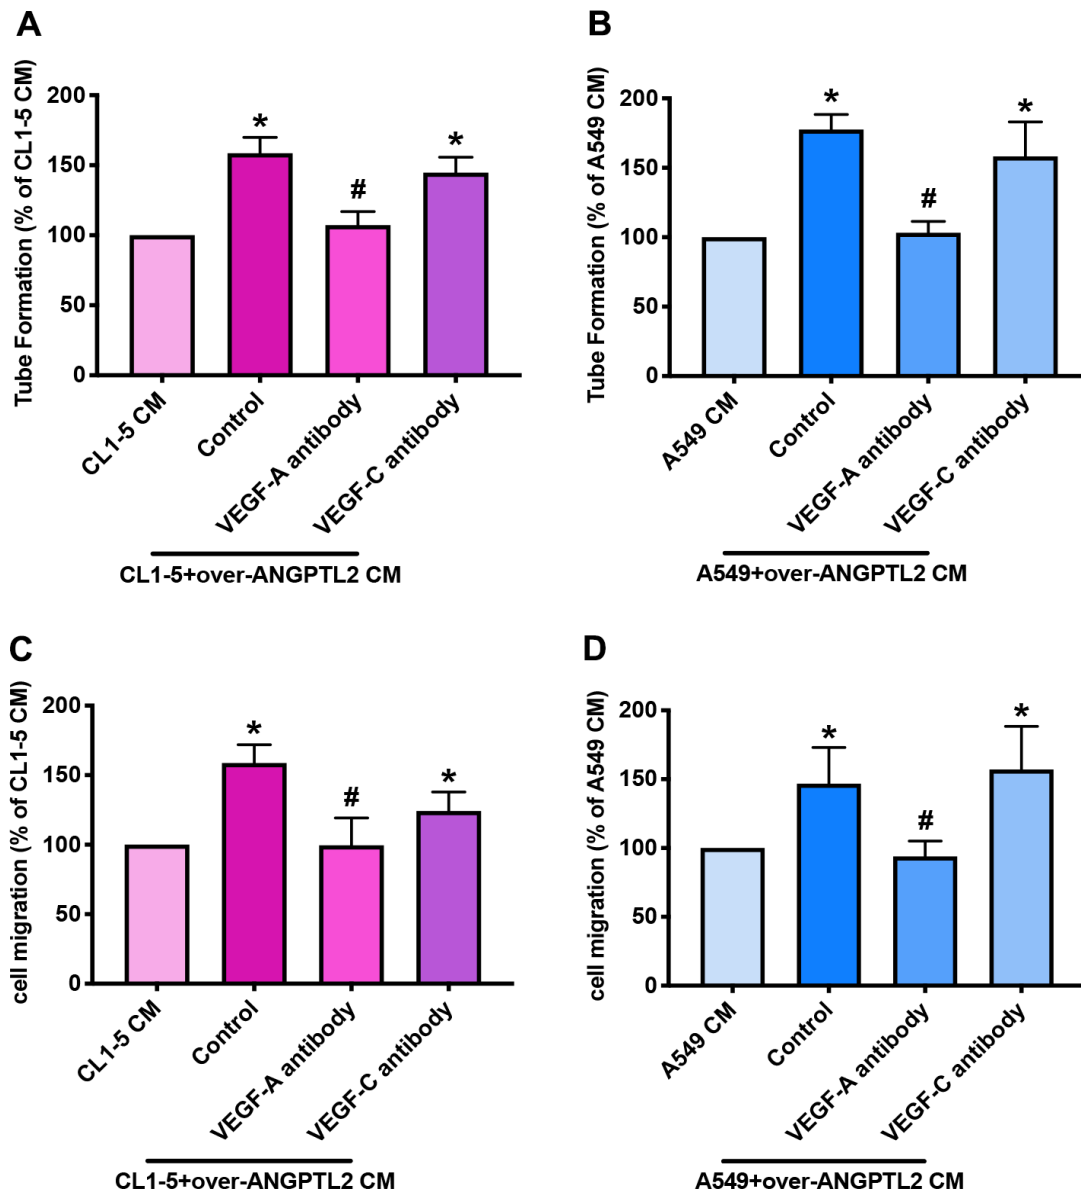

**Supplementary Figure 1. ANGPTL2 promotes VEGF-A-dependent LEC lymphangiogenesis.** (A–D) CL1-5 and A549 cells were transfected with ANGPTL2 shRNA. The CM was collected and applied to the LECs with VEGF-A or VEGF-C antibody. LEC tube formation and migration was examined. \* $p < 0.05$  compared with CL1-5 CM or A549 CM; # $p < 0.05$  compared with Control.
